# Supplementary material for: Heart-cut 2DSEC-RP-LC-ICP-MS as a screening tool in metal-based anticancer research
Source: Royal Society of Chemistry journal article supplement (doi:10.1039/c9ja00045c), 2019-01-01
Supplement: c9ja00045c1.pdf [file c9ja00045c1.pdf]

## HEART-CUT 2DSEC-RP-LC-ICP-MS AS A SCREENING TOOL IN METAL-BASED ANTICANCER RESEARCH

Luis Galvez<sup>a</sup> • Mate Ruz<sup>b</sup> • Michael A. Jakupec<sup>b</sup> • Gunda Koellensperger<sup>a</sup>

<sup>a</sup>Institute of Analytical Chemistry, Faculty of Chemistry, University of Vienna, Waehringer Strasse 38, 1090 Vienna (Austria).

<sup>b</sup>Cell Culture Facility, Institute of Inorganic Chemistry, University of Vienna, Althanstrasse 14 (UZA II), 1090 Vienna (Austria).

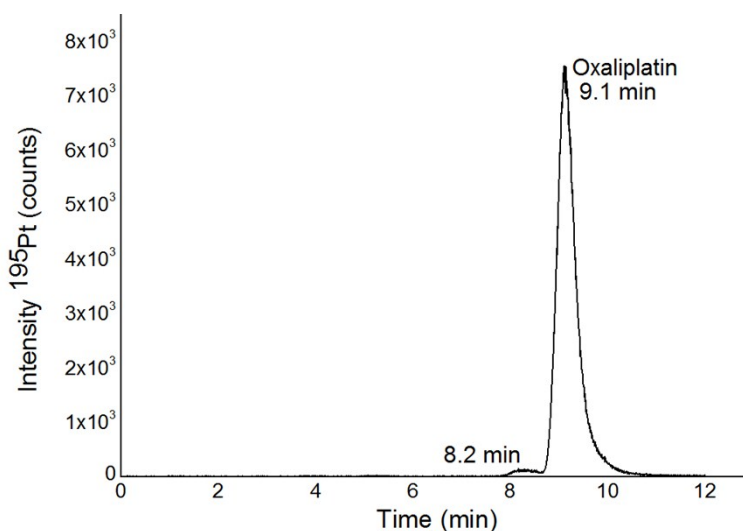

**Figure S1** UHPLC SEC-ICP-MS separation of oxaliplatin 2  $\mu$ M in NaCl 15 mM at a flow rate of 250  $\mu$ L/min in isocratic mode with 20 mM  $\text{CH}_3\text{COONH}_4$ , pH = 7. A hydrolysis product was observed at 8.2 min. Oxaliplatin was observed at 9.1 min.

**Table S1** HILIC-ICP-MS operation parameters and chromatographic conditions for the stability study of oxaliplatin.

| Agilent 1260 infinity Bio-inert       |                                                                                           |       |       |
|---------------------------------------|-------------------------------------------------------------------------------------------|-------|-------|
| Chromatographic conditions            |                                                                                           |       |       |
| Eluent                                | A 50 mM HCOONH <sub>4</sub> , pH = 4.0,<br>B 80% ACN 50 mM HCOONH <sub>4</sub> , pH = 5.0 |       |       |
| HILIC Column                          | Acquity UPLC BEH Amide (2.1 x 100 mm, 1.7 μm)                                             |       |       |
| Flow Rate                             | 250 μL/min                                                                                |       |       |
| Injection Volume                      | 5 μL                                                                                      |       |       |
| Autosampler Temperature               | 4°C                                                                                       |       |       |
| Gradient Elution                      |                                                                                           |       |       |
|                                       | Time (min)                                                                                | A (%) | B (%) |
|                                       | 0                                                                                         | 0     | 100   |
|                                       | 2                                                                                         | 0     | 100   |
|                                       | 8                                                                                         | 50    | 50    |
|                                       | 10                                                                                        | 50    | 50    |
|                                       | 10                                                                                        | 0     | 100   |
|                                       | 15                                                                                        | 0     | 100   |
| ICP-MS Triple Quadrupole Agilent 8800 |                                                                                           |       |       |
| Nebulizer                             | MicroMist                                                                                 |       |       |
| Spray chamber                         | Scott double-pass                                                                         |       |       |
| Nebulizer gas flow                    | 1.05 L/min                                                                                |       |       |
| Plasma gas                            | 15 L/min                                                                                  |       |       |
| ICP RF Power                          | 1550 W                                                                                    |       |       |
| Carrier Ar gas                        | 0.70 L/min                                                                                |       |       |
| Option O <sub>2</sub> gas             | 0.50 L/min                                                                                |       |       |
| m/z measured                          | 195                                                                                       |       |       |

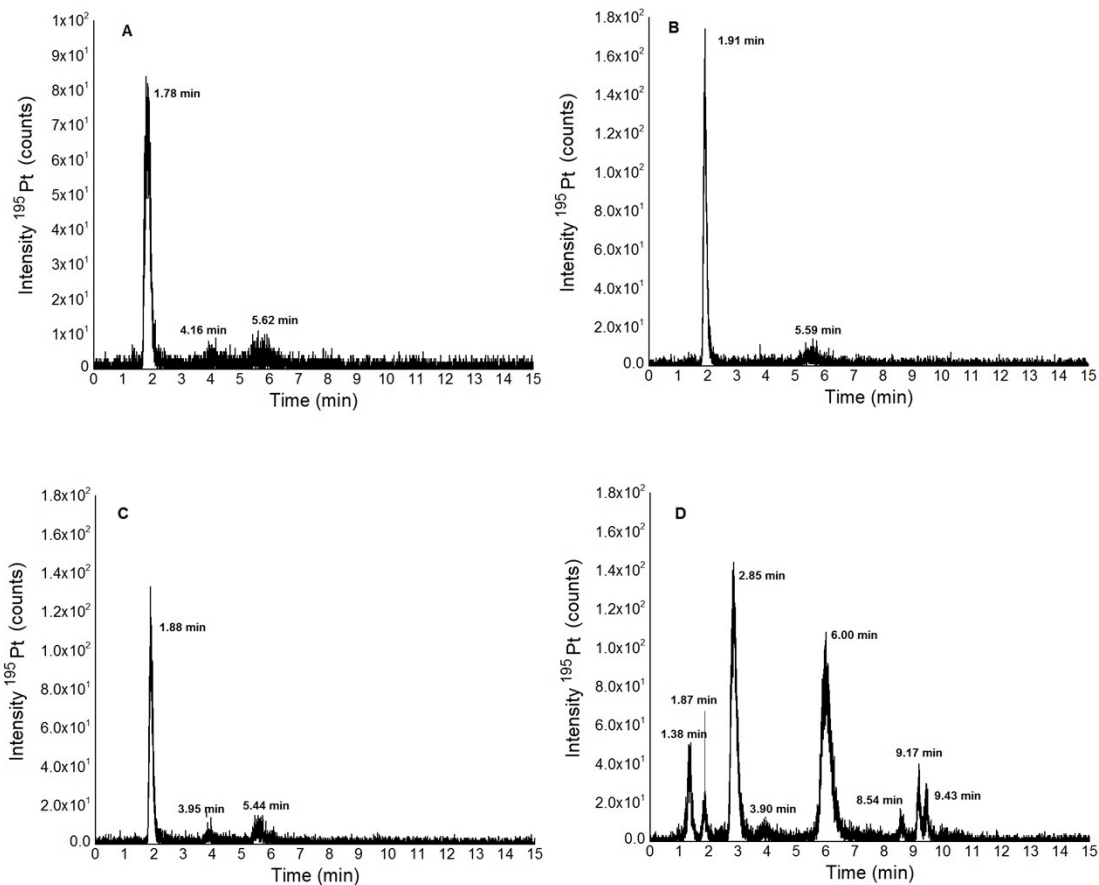

**Figure S2** Chromatographic separations with the HILIC-ICP-MS method of (A) oxaliplatin 0.5  $\mu\text{M}$  in glucose 5% (w/v) (B) oxaliplatin 0.5  $\mu\text{M}$  in MeOH (80% methanol, 20% water, v/v) stored at  $-80^\circ\text{C}$  for 96h (C) oxaliplatin 0.5  $\mu\text{M}$  in ACN (50% ACN, 50% water, v/v) (D) 200  $\mu\text{L}$  oxaliplatin 0.5  $\mu\text{M}$  in MeOH (80% methanol, 20% water, v/v) evaporated in a speedvac and reconstituted in 50  $\mu\text{L}$  ACN (50% ACN, 50% water, v/v).
